# Supplementary material for: Diurnal and seasonal variation of particle and dissolved organic matter release by the coral Acropora tenuis
Source: PeerJ. 2018 Nov 7;6:e5728. doi: 10.7717/peerj.5728 (PMC6228548; doi:10.7717/peerj.5728)
Supplement: Supplemental Information 1 — The data for POC, PON and DOC release by corals incubated at day and night time in summer and winter. [file peerj-06-5728-s001.xlsx]

## Sheet: Sheet1
Figure1 raw data		Summer								Winter
		POC		PON		DOC				POC		PON		DOC
colony		day	night	day	night	day	night			day	night	day	night	day	night
1	1	110.799	9.68495	11.8081	0.867851	28.8907	6.86389	0.260749		8.51706	1.2862	1.2862	1.98976	-4.18886	9.43092
1	2	19.7311	5.39138	1.06184	1.40157	2.42354	9.45359	0.122828		88.3319	5.58762	5.58762	1.56723	5.30645	-42.9093
1	3	nd	nd	nd	nd	nd	-11.8742	nd		7.3019	0.979964	0.979964	1.72498	-3.69824	-0.891026
1	4	18.3793	10.4436	1.78522	3.54125	13.4629	24.9296	0.7325		5.36086	0.616009	0.616009	1.61735	1.6733	-14.7919
2	5	105.446	21.0351	7.00113	4.86922	7.06445	23.5476	0.0669957		10.2978	1.29317	1.29317	2.82923	13.3623	-14.0345
2	6	116.419	17.5577	10.0739	1.83655	12.3994	nd	0.106506		13.6081	1.64834	1.64834	1.03389	-4.86221	-4.57565
2	7	36.2601	13.1852	2.2419	3.39693	8.6388	-23.4069	0.238245		19.0325	1.9553	1.9553	8.13505	45.4049	7.55917
2	8	33.2942	1.00466	4.01561	0.151314	37.7626	-17.5686	1.13421		18.4388	1.16717	1.16717	0.30909	-19.2462	-7.69844
3	9	21.0103	3.15286	4.11534	0.683213	2.4534	-12.4694	0.116771		18.4058	0.99	0.99	0.70634	35.0284	-10.9636
3	10	15.1181	54.6059	1.30142	6.28694	21.2711	16.536	1.407		52.9884	3.32791	3.32791	1.92758	14.5665	-7.20112
3	11	18.1081	6.77531	2.08482	1.10325	6.41307	3.47547	0.354155		17.4307	1.41462	1.41462	0.562169	-1.02727	-32.3738
3	12	31.1537	9.91758	1.16486	1.78595	51.9273	26.074	1.66681		35.473	2.08157	2.08157	0.647074	5.83772	-25.9777
