# Supplementary material for: Diurnal and seasonal variation of particle and dissolved organic matter release by the coral Acropora tenuis
Source: PeerJ. 2018 Nov 7;6:e5728. doi: 10.7717/peerj.5728 (PMC6228548; doi:10.7717/peerj.5728)
Supplement: Supplemental Information 2 — Net calcification, gross photosynthesis and respiration rate of corals at summer and winter. [file peerj-06-5728-s002.xlsx]

## Sheet: Sheet1
		summer	winter	summer		summer
colony	N	net calcification		gross Photosynthesis		Respiration
1	1	0.62523	0.430553	1.53172	1.33707	0.134946	0.135495
1	2	0.532454	0.426242	1.23628	1.14551	0.100308	0.0716855
1	3	0.583422	0.466024	1.42344	1.27427	0.169735	0.127349
1	4	0.784976	0.393076	1.74529	1.32821	0.0930869	0.0554175
2	5	0.354136	0.504946	1.07269	1.51529	0.0164824	-0.0124516
2	6	0.304753	0.394343	0.989091	1.11283	-0.0188651	0.00681462
2	7	0.258306	0.474281	1.08841	1.53799	0.162766	0.120221
2	8	0.412439	0.511352	1.1782	1.51186	0.0540324	-0.0238487
3	9	0.458497	0.308396	1.44317	1.16393	0.115595	0.0688894
3	10	0.444322	0.401111	1.04683	1.24102	0.184447	0.1026
3	11	0.470796	0.486563	1.34968	1.55275	0.0626981	0.0237181
3	12	0.517596	0.338089	1.75641	0.966981	0.386947	0.121023
